# Supplementary material
Source: PubMed Central journal article supplement (PMC4377643)
Supplement: NIHMS663292-supplement-1.pdf [file NIHMS663292-supplement-1.pdf]

**Table 1.** Characteristics of MESA participants in 4 ethnic groups at visit 1. Median values (inter-quartile range, IQR) are specified for continuous variables and (%) for categorical variables. Median values are shown for triglycerides and Lp(a). \* indicates significantly different ( $P < 0.05$ ) from all 3 other ethnic groups.

|                                 | <b>Blacks</b>      | <b>Caucasians</b> | <b>Chinese Americans</b> | <b>Hispanics</b> |
|---------------------------------|--------------------|-------------------|--------------------------|------------------|
| <b>Number</b>                   | 1323               | 1677              | 548                      | 1044             |
| <b>Age (years)</b>              | 61 (52-70)         | 62 (54-71)        | 62 (53-71)               | 61 (52-69)       |
| <b>Gender (male)</b>            | 621 (46.1%)        | 813 (47.6%)       | 217 (38.8%)              | 517 (48.6%)      |
| <b>Smoker</b>                   | 726 (53.9%)        | 929 (54.4%)       | 137 (24.5%)              | 504 (47.4%)      |
| <b>Diabetes</b>                 | 196 (14.6 %)       | 86 (5.0 %)        | 55 (9.8 %)               | 171 (16.1%)      |
| <b>Hypertensive</b>             | 428 (31.8%)        | 325 (19.0%)       | 126 (22.5%)              | 257 (24.2%)      |
| <b>On hypertension medicine</b> | 613 (45.5%)        | 493 (28.8%)       | 138 (24.7%)              | 305 (28.7%)      |
| <b>Non-Lp(a) LDL-C (mg/dL)</b>  | 113 (92-133)       | 115 (97-136)      | 114 (96-132)             | 116 (97-137)     |
| <b>HDL-C (mg/dL)</b>            | 50 (41-61)         | 50 (41-62)        | 48 (40-58) *             | 45 (38-54) *     |
| <b>Triglycerides (mg/dL)</b>    | 89 (66-122) *      | 110 (75-160) *    | 121 (85-169) *           | 133 (94-189) *   |
| <b>Lp(a) (mg/dL)</b>            | 35.1 (20.4-61.6) * | 12.9 (5.8-29.6)   | 12.9 (7.7-23.4)          | 13.1 (6.3-28.8)  |

Definitions: smoker = former or current; diabetic = treated or untreated; hypertensive = systolic blood pressure  $\geq 140$  mmHg; Lp(a) = lipoprotein(a); HDL-C = high density lipoprotein-cholesterol; LDL-C = low density lipoprotein-cholesterol.

**Table 2.** Associations of Lp(a) (per 1 log unit increase) and risk of CHD are presented as hazard ratios and adjusted for age, sex, smoking, hypertension medication, systolic blood pressure, diabetes, non-Lp(a) LDL-C, HDL-C, and log-triglycerides. An adjustment for race was made in the column denoted ‘All Groups.’ \* P value of <0.05 indicates significance.

|                | <b>Blacks</b> | <b>Caucasians</b> | <b>Chinese Americans</b> | <b>Hispanics</b> | <b>All Groups</b> |
|----------------|---------------|-------------------|--------------------------|------------------|-------------------|
| N              | 1323          | 1677              | 548                      | 1044             | 4593              |
| CHD events (%) | 66 (4.9)      | 102 (6.0)         | 18 (3.3)                 | 49 (4.6)         | 235 (5.0)         |
| Estimated HR   | 1.49          | 1.22              | 1.08                     | 1.14             | 1.26              |
| 95% CI         | (1.09, 2.04)  | (1.02, 1.45)      | (0.65, 1.80)             | (0.86, 1.50)     | (1.11, 2.03)      |
| <i>P</i> value | 0.014*        | 0.028*            | 0.77                     | 0.36             | <0.001*           |

For ATVB Peer Review. Do not distribute. Destroy after use.

**Table 3.** Associations of Lp(a) and risk of CHD are presented as hazard ratios and adjusted for age, sex, smoking, hypertension medication, systolic blood pressure, diabetes, non-Lp(a) LDL-C, HDL-C, and log-triglycerides. Lp(a) was examined as a categorical variable (30 and 50 mg/dL cut points). \* P value of <0.05 indicates significance. † number of individuals with Lp(a)  $\geq$  30 mg/dL; \*\*number of individuals with Lp(a)  $\geq$  50 mg/dL.

|                                   | <b>Blacks</b> | <b>Caucasians</b> | <b>Chinese Americans</b> | <b>Hispanics</b> | <b>All Groups</b> |
|-----------------------------------|---------------|-------------------|--------------------------|------------------|-------------------|
| N                                 | 1323          | 1677              | 548                      | 1044             | 4593              |
| CHD events (%)                    | 66 (4.9)      | 102 (6.0)         | 18 (3.3)                 | 49 (4.6)         | 5.03%             |
| <b><math>\geq</math> 30 mg/dL</b> |               |                   |                          |                  |                   |
| N (%) †                           | 774 (57.5)    | 423 (24.8)        | 108 (19.3)               | 258 (24.2)       | 1563 (33.4)       |
| Estimated HR                      | 1.87          | 1.44              | 1.39                     | 1.46             | 1.6               |
| 95% CI                            | (1.08, 3.21)  | (0.95, 2.18)      | (0.47, 4.08)             | (0.78, 2.75)     | (1.21, 2.10)      |
| P value                           | 0.024*        | 0.088             | 0.55                     | 0.23             | <0.001*           |
| <b><math>\geq</math> 50 mg/dL</b> |               |                   |                          |                  |                   |
| N (%) **                          | 445 (33.0)    | 255 (14.9)        | 54 (9.7)                 | 140 (13.2)       | 894 (19.1)        |
| Estimated HR                      | 1.69          | 1.82              | 1.04                     | 2.37             | 1.83              |
| 95% CI                            | (1.03, 2.76)  | (1.15, 2.88)      | (0.22, 4.98)             | (1.17, 4.78)     | (1.36, 2.46)      |
| P value                           | 0.037*        | 0.010*            | 0.96                     | 0.017*           | <0.001*           |
