# Supplementary material
Source: PubMed Central journal article supplement (PMC4377643)
Supplement: NIHMS663292-supplement-2.pdf [file NIHMS663292-supplement-2.pdf]

## SUPPLEMENTAL MATERIAL

Table I. Continuous Net Reclassification Improvement and c-statistics were generated to determine whether Lp(a) improves prediction of incident coronary heart disease cases and non-cases over the 8.5 year median study period. The baseline risk prediction model consisted of multiple variables including age, sex, smoking, hypertension medication, systolic blood pressure, diabetes, non-Lp(a) LDL-C, HDL-C, and log-triglycerides.

|                           | Population      | 1/2NRI | Lower CI | Upper CI | P value | M+    | M-   | Δ C-statistic |
|---------------------------|-----------------|--------|----------|----------|---------|-------|------|---------------|
| <b>30 mg/dL</b>           | All             | 0.10   | 0.01     | 0.17     | 0.04*   | 0.42  | 0.32 | 0.003         |
|                           | Caucasian       | 0.05   | -0.10    | 0.14     | 0.21    | 0.32  | 0.26 | 0.004         |
|                           | Black           | 0.17   | 0.00     | 0.28     | 0.05*   | 0.73  | 0.55 | 0.004         |
|                           | Chinese         | 0.01   | -0.28    | 0.32     | 0.53    | 0.23  | 0.22 | 0.002         |
|                           | Hispanic        | 0.06   | -0.16    | 0.21     | 0.41    | 0.30  | 0.25 | 0.001         |
|                           | <b>50 mg/dL</b> | All    | 0.11     | -0.03    | 0.17    | 0.09  | 0.30 | 0.19          |
| Caucasian                 |                 | 0.08   | -0.11    | 0.17     | 0.22    | 0.24  | 0.16 | 0.011         |
| Black                     |                 | 0.13   | -0.03    | 0.26     | 0.08    | 0.46  | 0.33 | 0.005         |
| Chinese                   |                 | -0.03  | -0.11    | 0.26     | 1.00    | 0.24  | 0.27 | 0.001         |
| Hispanic                  |                 | 0.08   | -0.12    | 0.23     | 0.25    | 0.24  | 0.15 | 0.005         |
| <b>Per unit log Lp(a)</b> |                 | All    | 0.07     | 0.00     | 0.14    | 0.053 | 0.55 | 0.48          |
|                           | Caucasian       | 0.06   | -0.07    | 0.16     | 0.32    | 0.54  | 0.48 | 0.005         |
|                           | Black           | 0.10   | -0.08    | 0.25     | 0.24    | 0.57  | 0.47 | 0.010         |
|                           | Chinese         | -0.09  | -0.26    | 0.26     | 1.00    | 0.41  | 0.51 | 0.000         |
|                           | Hispanic        | -0.03  | -0.19    | 0.16     | 1.00    | 0.48  | 0.50 | -0.004        |

**M+** (**Event NRI**) = the proportion of event subjects whose predicted probability of having an event in the new model is greater than that in the baseline model. A positive change in M+ represents an improvement in sensitivity.

**M- (Non-event NRI)** = the proportion of non-event subjects whose predicted probability of having an event in the new model is greater than that in the baseline model. A negative change in M- represents an improvement in specificity.
